# Supplementary material
Source: PubMed Central journal article supplement (PMC4048326)
Supplement: NIHMS579144-supplement-1.pdf [file NIHMS579144-supplement-1.pdf]

## Supplementary Information

Excessive TGF $\beta$  signaling is a common mechanism in Osteogenesis Imperfecta

Ingo Grafe, Tao Yang, Stefanie Alexander, Erica Homan, Caressa Lietman, Ming Ming Jiang, Terry Bertin, Elda Munivez, Yuqing Chen, Brian Dawson, Yoshihiro Ishikawa, Mary Ann Weis, T. Kuber Sampath, Catherine Ambrose, David Eyre, Hans Peter Bächinger, Brendan Lee

Correspondence to Brendan Lee: [blee@bcm.edu](mailto:blee@bcm.edu)

# Supplementary Figure 1

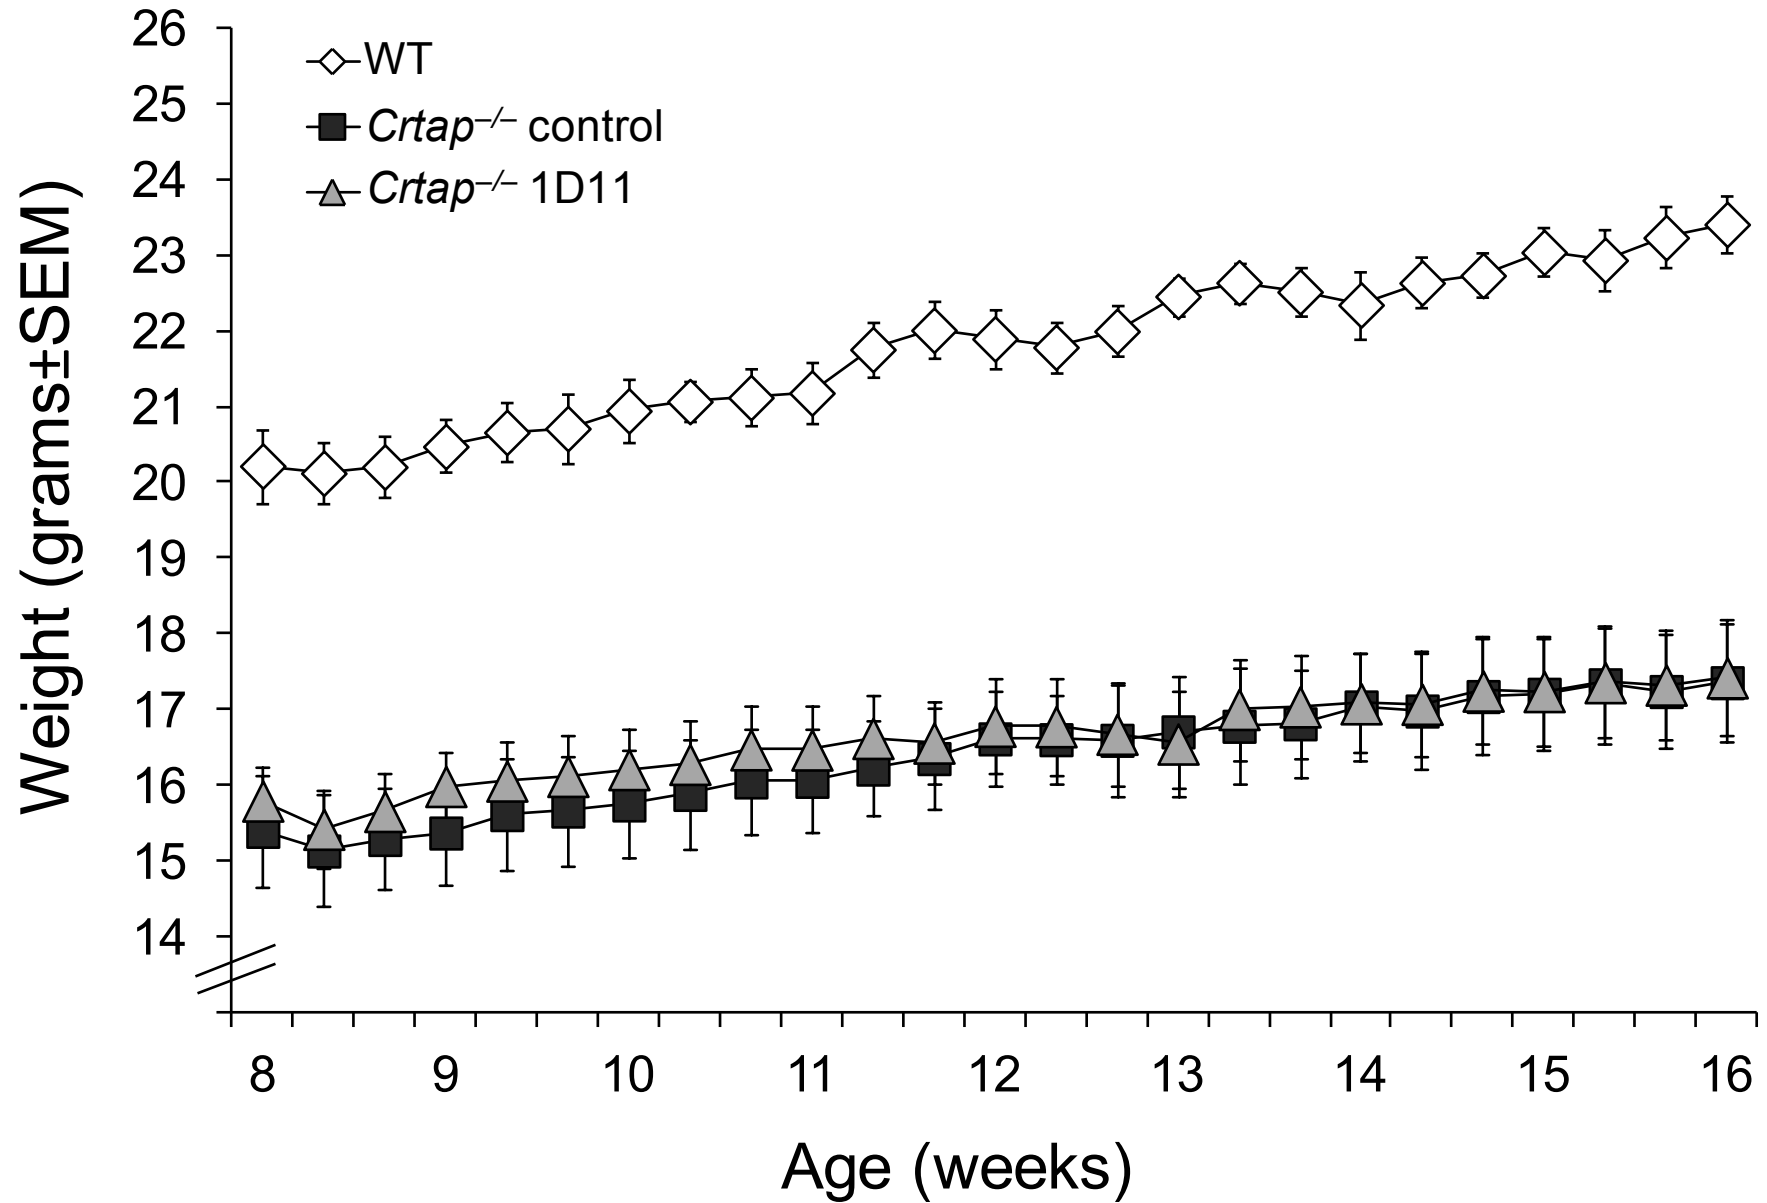

**Supplementary Figure 1.** Weight curves showing weight of WT, control *Crtap*<sup>-/-</sup> mice and 1D11-treated *Crtap*<sup>-/-</sup> mice during the study period. N=8 per group.

# Supplementary Figure 2

**a**

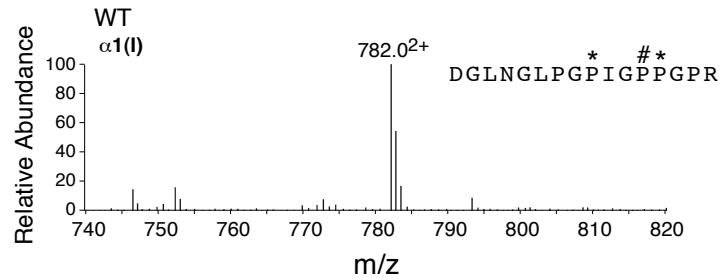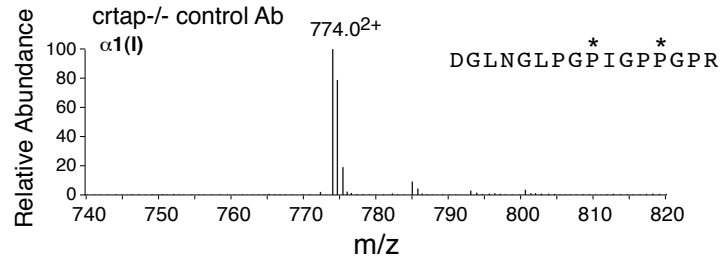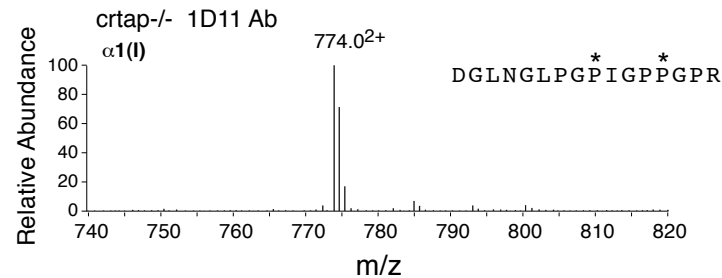

**b**

| 3Hyp            | WT          | <i>Crtap</i> <sup>-/-</sup> control | <i>Crtap</i> <sup>-/-</sup> 1D11 |
|-----------------|-------------|-------------------------------------|----------------------------------|
| P986 alpha 1(I) | 96.6% (2.1) | 5.8% (3.3)                          | 2.0% (1.2)                       |

**c**

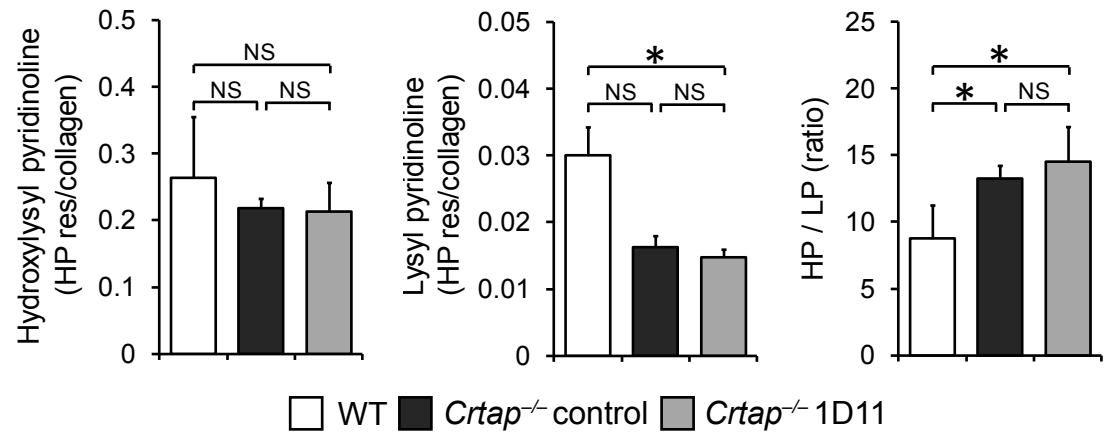

**Supplementary Figure 2.** No effect of TGF $\beta$  inhibition on the abnormal type I collagen post-translational modification in *Crtap*<sup>-/-</sup> mice. (a) Tandem mass spectra of extracted type I collagen from tibia of WT, control *Crtap*<sup>-/-</sup>, and 1D11- treated *Crtap*<sup>-/-</sup> mice (16 week old mice, after treatment for 8 weeks). (b) Status of collagen residue Pro986 alpha 1(I) 3-hydroxylation in bone samples of bone samples of WT, control *Crtap*<sup>-/-</sup> and 1D11- treated *Crtap*<sup>-/-</sup> mice assessed by tandem mass spectra analyses. Mean of percentage of 3-hydroxylated residues ( $\pm$ SD) is shown, n=5 per group. (c). Hydroxylysyl pyridinoline (HP), lysyl pyridinoline crosslinks (LP) levels and HP/LP ratio of bone type I collagen of WT, control *Crtap*<sup>-/-</sup> and 1D11- treated *Crtap*<sup>-/-</sup> mice. Results are given as means $\pm$ SDs, n=4 mice per group, \*P<0.05 for *Crtap*<sup>-/-</sup> vs. WT. NS, not significant.

# Supplementary Figure 3

**a**

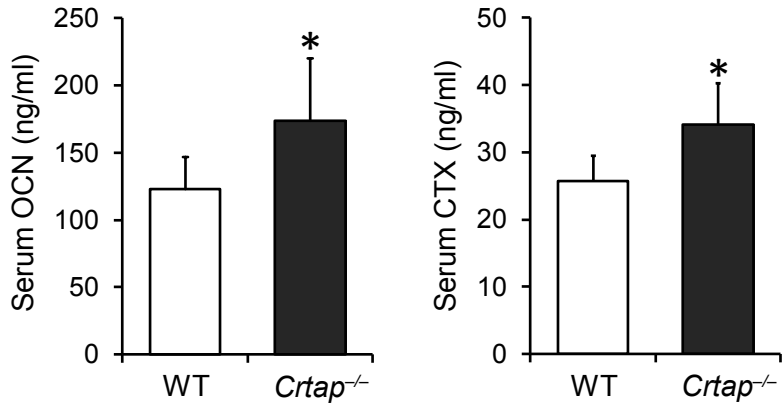

**b**

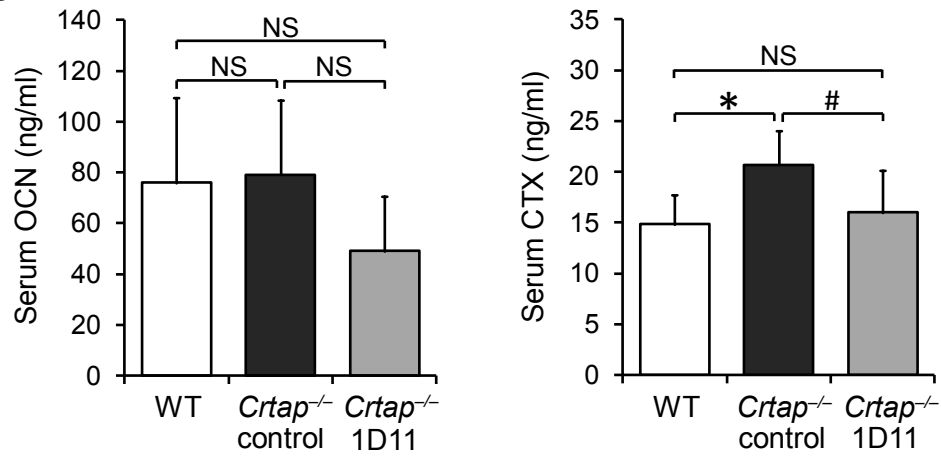

**Supplementary Figure 3.** Serum bone-turnover markers osteocalcin (OCN) and C-terminal cross-linked telopeptide of bone collagen (CTX) at start (a. 8 weeks of age) and end of the treatment study (b. 16 weeks of age). (a) Results are given as means±SDs, n=8 for WT, n=14 for *Crtap*<sup>-/-</sup> mice. (b) Results are given as means±SDs, n=8 for WT, n=7 per *Crtap*<sup>-/-</sup> group. \*P<0.05 for *Crtap*<sup>-/-</sup> vs. WT, #P<0.05 for *Crtap*<sup>-/-</sup> 1D11 vs. *Crtap*<sup>-/-</sup> control. NS, not significant.

## Supplementary Figure 4

WT

*Crtap*<sup>-/-</sup>

control

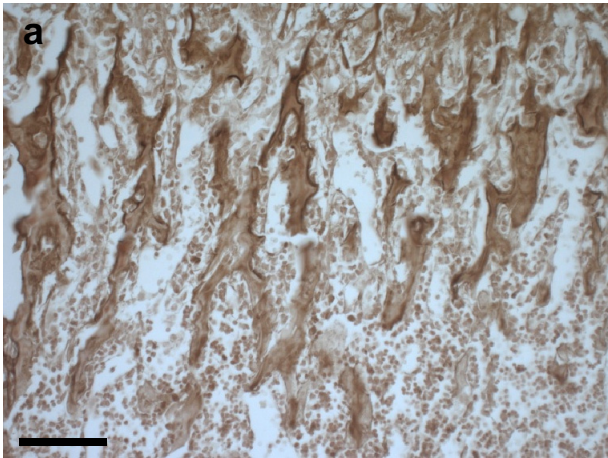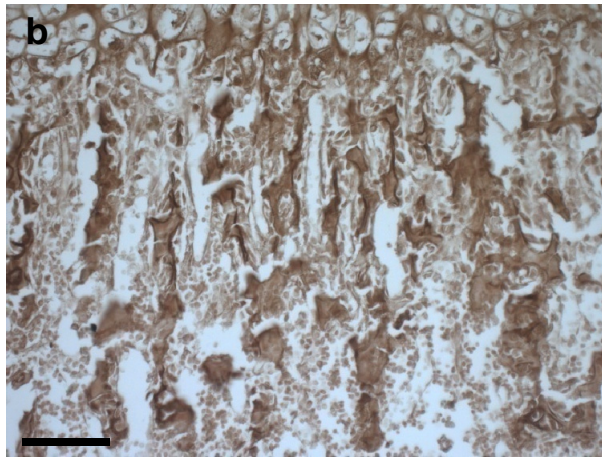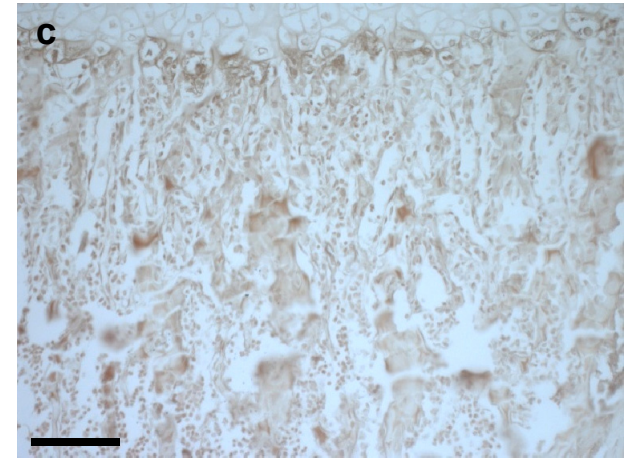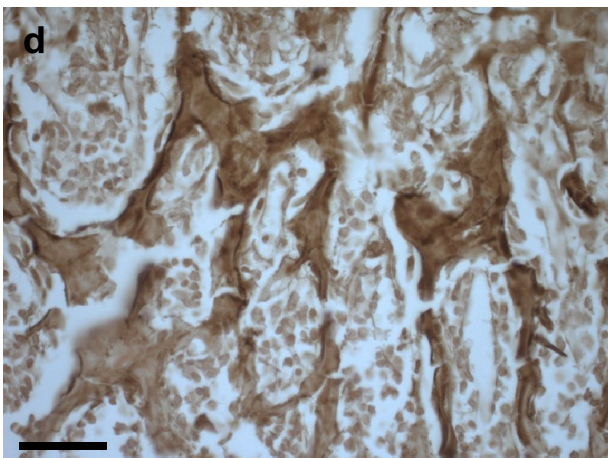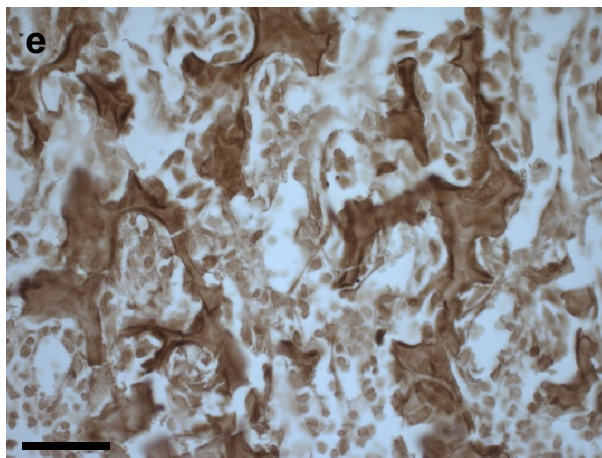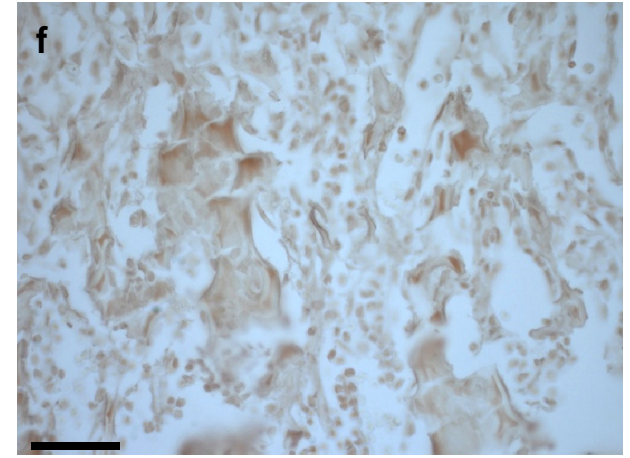

**Supplementary Figure 4.** Immunostaining for decorin in the distal femur metaphysis of WT and *Crtap*<sup>-/-</sup> mice is shown in 20X (a–c) and 40X magnification (d–f). Control femurs were incubated in secondary antibody only. (n=3 per genotype; scale bars=100µm (a–c), 50µm (d–f)).

## Supplementary Figure 5

WT

*Crtap*<sup>-/-</sup>

control

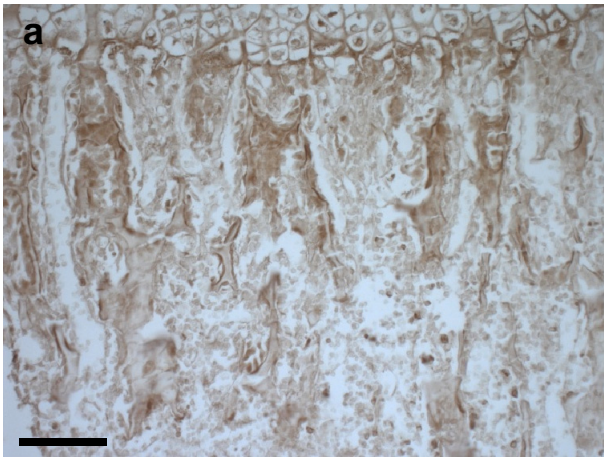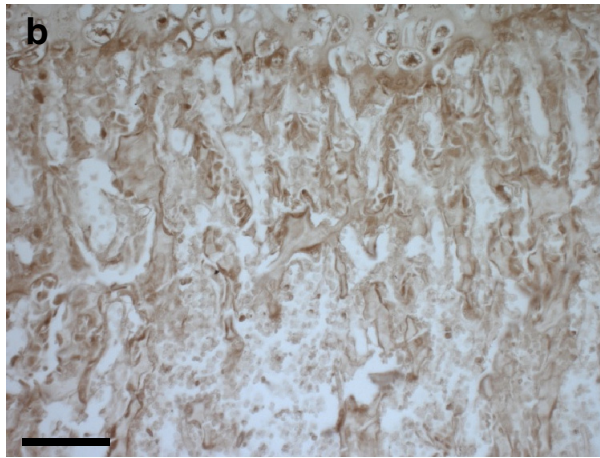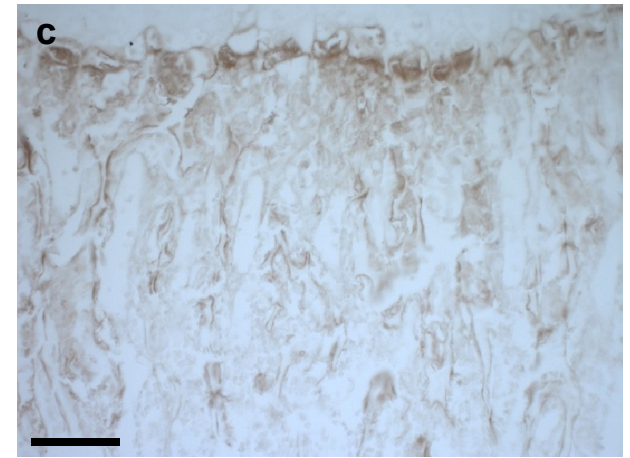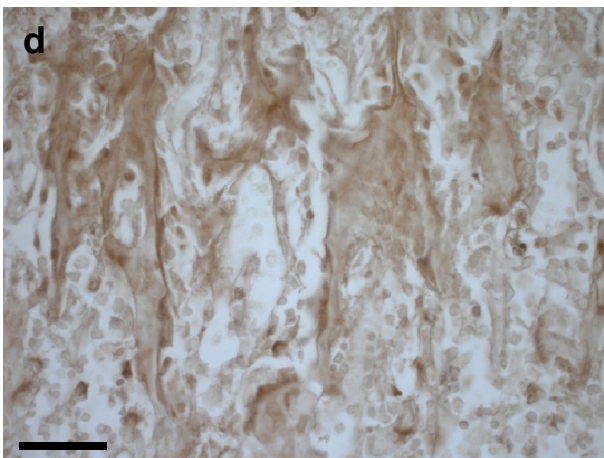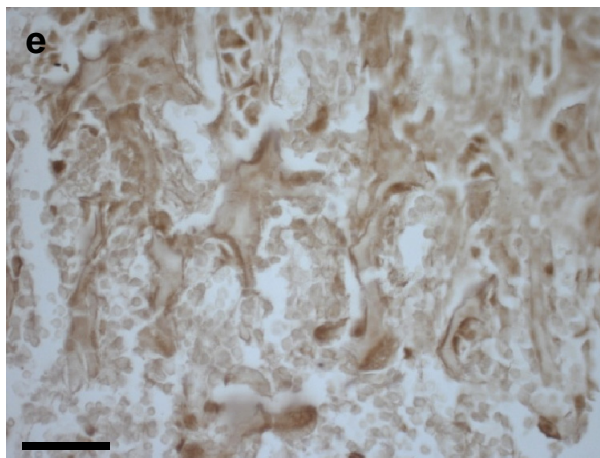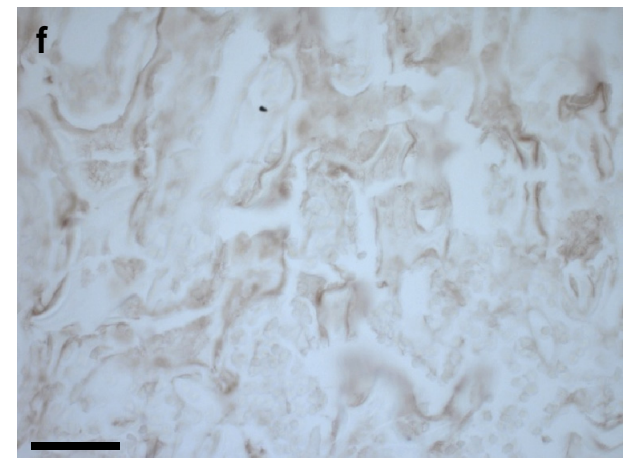

**Supplementary Figure 5.** Immunostaining for TGFβ1 in the distal femur metaphysis of WT and *Crtap*<sup>-/-</sup> mice is shown in 20X (a–c) and 40X magnification (d–f). Control femurs were incubated in secondary antibody only (n=3 per genotype; scale bars=100μm (a–c), 50μm (d–f)).

## Supplementary Figure 6

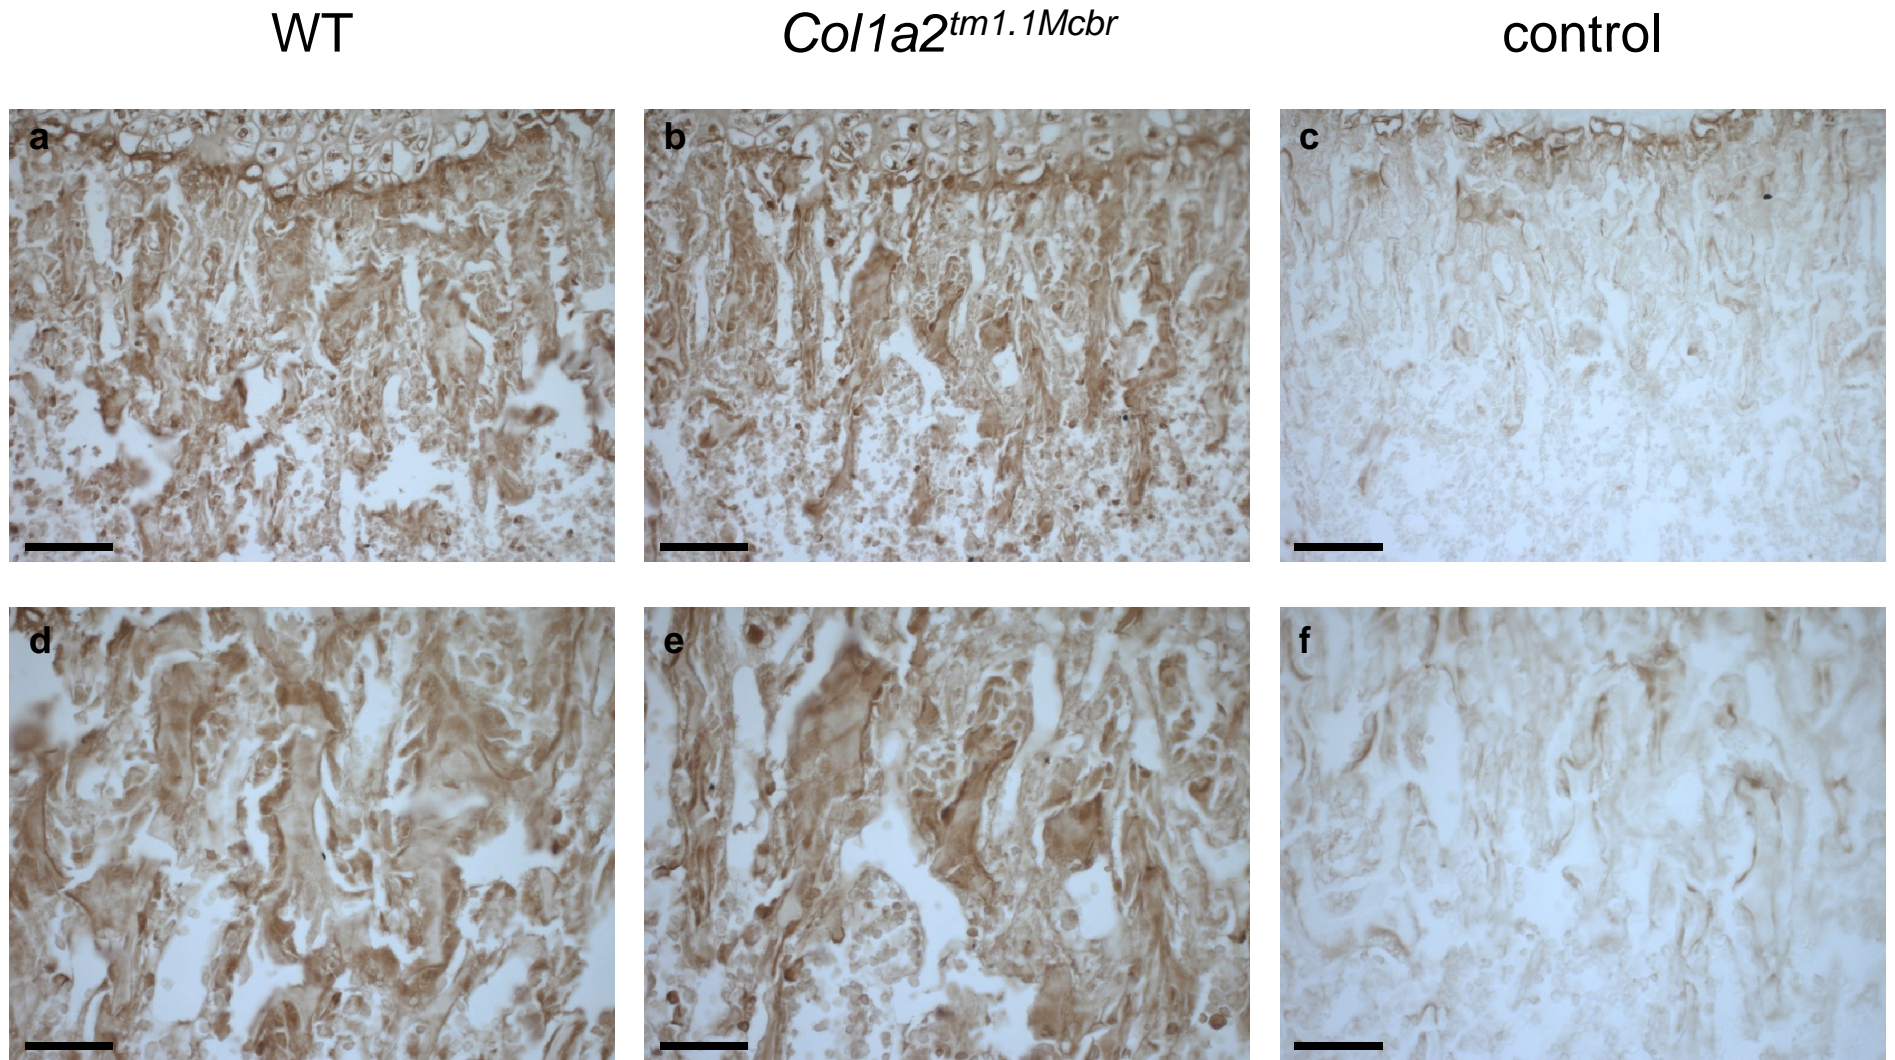

**Supplementary Figure 6.** Immunostaining for TGFβ1 in the distal femur metaphysis of WT and *Col1a2<sup>tm1.1Mabr</sup>* mice is shown in 20X (a–c) and 40X magnification (d–f). Control femurs were incubated in secondary antibody only. (n=3 per genotype; scale bars=100μm (a–c), 50μm (d–f)).

Supplementary Table 1

|                                                                          | <b>BV/TV</b><br>(%) | <b>Tb.N</b><br>(1/mm) | <b>Tb.Th</b><br>( $\mu$ m)   | <b>Tb.Sp</b><br>(mm)         | <b>BMD BV</b><br>(mg HA/ccm) |
|--------------------------------------------------------------------------|---------------------|-----------------------|------------------------------|------------------------------|------------------------------|
| <b>Wild type</b>                                                         | <b>31.173</b>       | <b>4.845</b>          | <b>63.988</b>                | <b>0.145</b>                 | <b>703.189</b>               |
| SD                                                                       | 6.543               | 0.583                 | 9.482                        | 0.034                        | 19.014                       |
| <b><i>Crtap</i><sup>-/-</sup> control</b>                                | <b>8.354</b>        | <b>2.130</b>          | <b>38.888</b>                | <b>0.450</b>                 | <b>677.416</b>               |
| SD                                                                       | 2.045               | 0.409                 | 2.931                        | 0.118                        | 16.138                       |
| <b><i>Crtap</i><sup>-/-</sup> 1D11</b>                                   | <b>27.953</b>       | <b>4.290</b>          | <b>64.650</b>                | <b>0.171</b>                 | <b>746.862</b>               |
| SD                                                                       | 5.645               | 0.435                 | 7.407                        | 0.030                        | 26.564                       |
| <b>ANOVA <i>P</i> value</b>                                              | <b>&lt;0.001</b>    | <b>&lt;0.001</b>      | <b>&lt;0.001<sup>+</sup></b> | <b>&lt;0.001<sup>+</sup></b> | <b>&lt;0.001</b>             |
| <b>Pairwise <i>P</i> values</b>                                          |                     |                       |                              |                              |                              |
| Wild type vs. <i>Crtap</i> <sup>-/-</sup> control                        | <0.001              | <0.001                | <0.05                        | <0.05                        | 0.023                        |
| Wild type vs. <i>Crtap</i> <sup>-/-</sup> 1D11                           | n.s.                | 0.031                 | n.s.                         | n.s.                         | <0.001                       |
| <i>Crtap</i> <sup>-/-</sup> control vs. <i>Crtap</i> <sup>-/-</sup> 1D11 | <0.001              | <0.001                | <0.05                        | <0.05                        | <0.001                       |

**Supplementary Table 1.** MicroCT analyses of vertebral body L4 of WT, control *Crtap*<sup>-/-</sup> and 1D11 treated *Crtap*<sup>-/-</sup> mice (16 week old mice, after treatment for 8 weeks). Means $\pm$ SDs are shown for bone volume/tissue volume (BV/TV), trabecular number (Tb.N), trabecular thickness (Tb.Th), trabecular separation (Tb.Sp), and bone mineral density of bone volume (BMD BV); n=8 per group, + indicates Kruskal-Wallis one-way ANOVA on ranks where the equal variance test failed. n.s.=not statistically significant.



Supplementary Table 2

|                                                                          | <b>BV/TV</b><br>(%)          | <b>Tb.N</b><br>(1/mm)        | <b>Tb.Th</b><br>( $\mu$ m) | <b>Tb.Sp</b><br>(mm) | <b>BMD BV</b><br>(mg HA/ccm) |
|--------------------------------------------------------------------------|------------------------------|------------------------------|----------------------------|----------------------|------------------------------|
| <b>Wild type</b>                                                         | <b>10.698</b>                | <b>2.808</b>                 | <b>37.413</b>              | <b>0.341</b>         | <b>733.864</b>               |
| SD                                                                       | 3.558                        | 0.684                        | 5.071                      | 0.108                | 25.997                       |
| <b><i>Crtap</i><sup>-/-</sup> control</b>                                | <b>2.873</b>                 | <b>0.861</b>                 | <b>32.863</b>              | <b>1.209</b>         | <b>727.151</b>               |
| SD                                                                       | 1.082                        | 0.237                        | 3.428                      | 0.345                | 28.765                       |
| <b><i>Crtap</i><sup>-/-</sup> 1D11</b>                                   | <b>12.343</b>                | <b>2.953</b>                 | <b>40.663</b>              | <b>0.323</b>         | <b>756.539</b>               |
| SD                                                                       | 4.523                        | 0.767                        | 5.842                      | 0.121                | 36.913                       |
| <b>ANOVA <i>P</i> value</b>                                              | <b>&lt;0.001<sup>+</sup></b> | <b>&lt;0.001<sup>+</sup></b> | <b>0.015</b>               | <b>&lt;0.001</b>     | <b>0.162</b>                 |
| <b>Pairwise <i>P</i> values</b>                                          |                              |                              |                            |                      |                              |
| Wild type vs. <i>Crtap</i> <sup>-/-</sup> control                        | <0.05                        | <0.05                        | n.s.                       | <0.001               |                              |
| Wild type vs. <i>Crtap</i> <sup>-/-</sup> 1D11                           | n.s.                         | n.s.                         | n.s.                       | n.s.                 |                              |
| <i>Crtap</i> <sup>-/-</sup> control vs. <i>Crtap</i> <sup>-/-</sup> 1D11 | <0.05                        | <0.05                        | 0,004                      | <0.001               |                              |

**Supplementary Table 2.** MicroCT analyses of trabecular bone in proximal femurs for WT, control *Crtap*<sup>-/-</sup>, and 1D11- treated *Crtap*<sup>-/-</sup> mice (16 week old mice, after treatment for 8 weeks). Means $\pm$ SDs are shown for bone volume/tissue volume (BV/TV), trabecular number (Tb.N), trabecular thickness (Tb.Th), trabecular separation (Tb.Sp) and bone mineral density of bone volume (BMD BV); n=8 per group. + indicates Kruskal-Wallis one-way ANOVA on ranks where the equal variance test failed. n.s.=not statistically significant.

Supplementary Table 3

|                                                                          | <b>Cortical thickness</b><br>(mm) | <b>BMD BV</b><br>(mg HA/ccm) | <b>Diameter a.p.</b><br>(mm) | <b>CSA</b><br>(mm <sup>2</sup> ) | <b>CSMI m.l.</b><br>(mm <sup>4</sup> ) | <b>CSMI a.p.</b><br>(mm <sup>4</sup> ) |
|--------------------------------------------------------------------------|-----------------------------------|------------------------------|------------------------------|----------------------------------|----------------------------------------|----------------------------------------|
| <b>Wild type</b>                                                         | <b>0.242</b>                      | <b>1084.726</b>              | <b>1.239</b>                 | <b>0.905</b>                     | <b>0.134</b>                           | <b>0.221</b>                           |
| SD                                                                       | 0.014                             | 28.375                       | 0.063                        | 0.079                            | 0.023                                  | 0.042                                  |
| <b><i>Crtap</i><sup>-/-</sup> control</b>                                | <b>0.203</b>                      | <b>1084.885</b>              | <b>1.142</b>                 | <b>0.731</b>                     | <b>0.101</b>                           | <b>0.162</b>                           |
| SD                                                                       | 0.020                             | 34.256                       | 0.065                        | 0.082                            | 0.021                                  | 0.034                                  |
| <b><i>Crtap</i><sup>-/-</sup> 1D11</b>                                   | <b>0.221</b>                      | <b>1096.127</b>              | <b>1.186</b>                 | <b>0.808</b>                     | <b>0.111</b>                           | <b>0.186</b>                           |
| SD                                                                       | 0.026                             | 39.754                       | 0.080                        | 0.118                            | 0.028                                  | 0.038                                  |
| <b>ANOVA <i>P</i> value</b>                                              | <b>0.003</b>                      | <b>0.753</b>                 | <b>0.039</b>                 | <b>0.005</b>                     | <b>0.032</b>                           | <b>0.021</b>                           |
| <b>Pairwise <i>P</i> values</b>                                          |                                   |                              |                              |                                  |                                        |                                        |
| Wild type vs. <i>Crtap</i> <sup>-/-</sup> control                        | <0.001                            |                              | 0.012                        | 0.001                            | 0.011                                  | 0.006                                  |
| Wild type vs. <i>Crtap</i> <sup>-/-</sup> 1D11                           | n.s.                              |                              | n.s.                         | n.s.                             | n.s.                                   | n.s.                                   |
| <i>Crtap</i> <sup>-/-</sup> control vs. <i>Crtap</i> <sup>-/-</sup> 1D11 | n.s.                              |                              | n.s.                         | n.s.                             | n.s.                                   | n.s.                                   |

**Supplementary Table 3.** MicroCT analysis of cortical bone at the femur midshaft for WT, control *Crtap*<sup>-/-</sup>, and 1D11-treated *Crtap*<sup>-/-</sup> mice (16 week old mice, after treatment for 8 weeks). Means±SDs are shown for cortical thickness, bone mineral density of bone volume (BMD BV), anterior-posterior (a.p.) diameter, cross-sectional area (CSA), and cross-sectional moments of inertia (CSMI) for medio-lateral (m.l.) and anterior-posterior (a.p.) axis; n=8 per group. n.s.=not statistically significant.

Supplementary Table 4

|                                                                          | Maximum load (N) | Stiffness (N/mm) | Energy to failure (N*mm) | Ultimate strength (MPa) | Toughness to failure (MPa) | Elastic modulus (GPa) | Total displacement (mm) | Elastic displacement (mm) | Post-yield displacement (mm) |
|--------------------------------------------------------------------------|------------------|------------------|--------------------------|-------------------------|----------------------------|-----------------------|-------------------------|---------------------------|------------------------------|
| <b>Wild type</b>                                                         | <b>22.831</b>    | <b>230.578</b>   | <b>7.846</b>             | <b>154.704</b>          | <b>11.912</b>              | <b>6.960</b>          | <b>0.444</b>            | <b>0.068</b>              | <b>0.376</b>                 |
| SD                                                                       | 2.860            | 37.053           | 3.985                    | 7.478                   | 5.695                      | 0.731                 | 0.207                   | 0.014                     | 0.203                        |
| <b><i>Crtap</i><sup>-/-</sup> control</b>                                | <b>12.943</b>    | <b>151.689</b>   | <b>1.228</b>             | <b>114.496</b>          | <b>2.208</b>               | <b>6.663</b>          | <b>0.127</b>            | <b>0.079</b>              | <b>0.048</b>                 |
| SD                                                                       | 2.402            | 27.384           | 0.913                    | 18.240                  | 1.677                      | 1.154                 | 0.057                   | 0.006                     | 0.058                        |
| <b><i>Crtap</i><sup>-/-</sup> 1D11</b>                                   | <b>18.818</b>    | <b>200.804</b>   | <b>1.991</b>             | <b>145.633</b>          | <b>3.408</b>               | <b>7.248</b>          | <b>0.156</b>            | <b>0.073</b>              | <b>0.083</b>                 |
| SD                                                                       | 2.337            | 15.644           | 0.834                    | 19.074                  | 1.851                      | 0.271                 | 0.055                   | 0.013                     | 0.055                        |
| <b>ANOVA <i>P</i> value</b>                                              | <b>&lt;0.001</b> | <b>0.009</b>     | <b>0.009</b>             | <b>0.004</b>            | <b>0.009</b>               | <b>0.658</b>          | <b>0.015</b>            | <b>0.360</b>              | <b>0.012</b>                 |
| <b>Pairwise <i>P</i> values</b>                                          |                  |                  |                          |                         |                            |                       |                         |                           |                              |
| Wild type vs. <i>Crtap</i> <sup>-/-</sup> control                        | <0.001           | 0.003            | 0.005                    | 0.001                   | 0.005                      |                       | 0.009                   |                           | 0.007                        |
| Wild type vs. <i>Crtap</i> <sup>-/-</sup> 1D11                           | n.s.             | n.s.             | 0.017                    | n.s.                    | 0.017                      |                       | 0.023                   |                           | 0.019                        |
| <i>Crtap</i> <sup>-/-</sup> control vs. <i>Crtap</i> <sup>-/-</sup> 1D11 | 0.015            | n.s.             | n.s.                     | 0.016                   | n.s.                       |                       | n.s.                    |                           | n.s.                         |

**Supplementary Table 4.** Results of biomechanical testing of femurs from WT, control *Crtap*<sup>-/-</sup> and 1D11 treated *Crtap*<sup>-/-</sup> mice by 3-point bending (16 week old mice, after treatment for 8 weeks). N=6 for WT, n=4 for control *Crtap*<sup>-/-</sup> and n=3 for 1D11 treated *Crtap*<sup>-/-</sup> mice. Results are shown as means±SDs. n.s.=not statistically significant.

Supplementary Table 5

|                                                                          | <b>BV/TV</b><br>(%) | <b>Tb.N</b><br>(1/mm) | <b>Tb.Th</b><br>( $\mu$ m) | <b>Tb.Sp</b><br>( $\mu$ m) | <b>N.Oc/BS</b><br>(1/mm) | <b>Oc.S/BS</b><br>(%) | <b>N.Ob/BS</b><br>(1/mm) | <b>Ob.S/BS</b><br>(%) | <b>N.Ot/B.Ar</b><br>(1/mm <sup>2</sup> ) |
|--------------------------------------------------------------------------|---------------------|-----------------------|----------------------------|----------------------------|--------------------------|-----------------------|--------------------------|-----------------------|------------------------------------------|
| <b>Wild type</b>                                                         | <b>11.956</b>       | <b>4.003</b>          | <b>29.554</b>              | <b>226.736</b>             | <b>3.226</b>             | <b>15.051</b>         | <b>18.142</b>            | <b>20.827</b>         | <b>549.002</b>                           |
| SD                                                                       | 3.067               | 0.656                 | 3.536                      | 50.077                     | 0.812                    | 3.089                 | 2.368                    | 2.754                 | 83.665                                   |
| <b><i>Crtap</i><sup>-/-</sup> control</b>                                | <b>3.817</b>        | <b>1.909</b>          | <b>19.502</b>              | <b>587.008</b>             | <b>4.768</b>             | <b>19.885</b>         | <b>24.487</b>            | <b>26.888</b>         | <b>735.561</b>                           |
| SD                                                                       | 1.656               | 0.692                 | 2.560                      | 289.835                    | 0.914                    | 3.407                 | 5.421                    | 6.983                 | 72.617                                   |
| <b><i>Crtap</i><sup>-/-</sup> 1D11</b>                                   | <b>10.203</b>       | <b>3.411</b>          | <b>30.182</b>              | <b>277.886</b>             | <b>1.772</b>             | <b>6.829</b>          | <b>8.638</b>             | <b>9.748</b>          | <b>565.044</b>                           |
| SD                                                                       | 3.097               | 0.878                 | 6.982                      | 69.118                     | 0.673                    | 2.235                 | 2.855                    | 4.718                 | 51.014                                   |
| <b>ANOVA <i>P</i> value</b>                                              | <b>&lt;0.001</b>    | <b>&lt;0.001</b>      | <b>0.002</b>               | <b>0.003<sup>+</sup></b>   | <b>&lt;0.001</b>         | <b>&lt;0.001</b>      | <b>&lt;0.001</b>         | <b>&lt;0.001</b>      | <b>&lt;0.001</b>                         |
| <b>Pairwise <i>P</i> values</b>                                          |                     |                       |                            |                            |                          |                       |                          |                       |                                          |
| Wild type vs. <i>Crtap</i> <sup>-/-</sup> control                        | <0.001              | <0.001                | 0.002                      | <0.05                      | 0.005                    | 0.012                 | 0.011                    | n.s.                  | <0.001                                   |
| Wild type vs. <i>Crtap</i> <sup>-/-</sup> 1D11                           | n.s.                | n.s.                  | n.s.                       | n.s.                       | 0.007                    | <0.001                | <0.001                   | 0.002                 | n.s.                                     |
| <i>Crtap</i> <sup>-/-</sup> control vs. <i>Crtap</i> <sup>-/-</sup> 1D11 | <0.001              | 0.003                 | 0.001                      | <0.05                      | <0.001                   | <0.001                | <0.001                   | <0.001                | <0.001                                   |

**Supplementary Table 5.** Histomorphometry analyses of L4 vertebral bodies of WT, control *Crtap*<sup>-/-</sup>, and 1D11- treated *Crtap*<sup>-/-</sup> mice (16 week old mice, after treatment for 8 weeks). Means $\pm$ SDs are shown for bone volume/tissue volume (BV/TV), trabecular number (Tb.N), trabecular thickness (Tb.Th), trabecular separation (Tb.Sp), number of osteoclasts/bone surface (N.Oc/BS), osteoclast surface/bone surface (Oc.S/BS), number of osteoblasts/bone surface (N.Ob/BS), osteoblast surface/bone surface (Oc.S/BS), and number of osteocytes/bone area (N.Ot/B.Ar); n=6 per group. + indicates Kruskal-Wallis one way ANOVA on ranks where equal variance test failed. n.s.=not statistically significant.

Supplementary Table 6

|                                                                                      | <b>BV/TV</b><br>(%) | <b>Tb.N</b><br>(1/mm) | <b>Tb.Th</b><br>( $\mu$ m) | <b>Tb.Sp</b><br>(mm) | <b>BMD BV</b><br>(mg HA/ccm) |
|--------------------------------------------------------------------------------------|---------------------|-----------------------|----------------------------|----------------------|------------------------------|
| <b>Wild type</b>                                                                     | <b>24.708</b>       | <b>3.939</b>          | <b>62.533</b>              | <b>0.193</b>         | <b>716.669</b>               |
| SD                                                                                   | 3.282               | 0.330                 | 3.497                      | 0.025                | 7.626                        |
| <b><i>Col1a2</i><sup>tm1.1Mcb</sup> control</b>                                      | <b>10.608</b>       | <b>2.071</b>          | <b>51.067</b>              | <b>0.435</b>         | <b>731.436</b>               |
| SD                                                                                   | 1.487               | 0.195                 | 2.999                      | 0.047                | 11.792                       |
| <b><i>Col1a2</i><sup>tm1.1Mcb</sup> 1D11</b>                                         | <b>29.715</b>       | <b>4.244</b>          | <b>69.983</b>              | <b>0.166</b>         | <b>754.115</b>               |
| SD                                                                                   | 1.984               | 0.199                 | 2.329                      | 0.013                | 7.844                        |
| <b>ANOVA P value</b>                                                                 | <b>&lt;0.001</b>    | <b>&lt;0.001</b>      | <b>&lt;0.001</b>           | <b>&lt;0.001</b>     | <b>&lt;0.001</b>             |
| <b>Pairwise P values</b>                                                             |                     |                       |                            |                      |                              |
| Wild type vs. <i>Col1a2</i> <sup>tm1.1Mcb</sup> control                              | <0.001              | <0.001                | <0.001                     | <0.001               | 0.015                        |
| Wild type vs. <i>Col1a2</i> <sup>tm1.1Mcb</sup> 1D11                                 | 0.002               | n.s.                  | <0.001                     | n.s.                 | <0.001                       |
| <i>Col1a2</i> <sup>tm1.1Mcb</sup> control vs. <i>Col1a2</i> <sup>tm1.1Mcb</sup> 1D11 | <0.001              | <0.001                | <0.001                     | <0.001               | <0.001                       |

**Supplementary Table 6.** MicroCT analyses of vertebral body L4 of WT, control *Col1a2*<sup>tm1.1Mcb</sup> and 1D11 treated *Col1a2*<sup>tm1.1Mcb</sup> mice (16 week old mice, after treatment for 8 weeks). Means $\pm$ SDs are shown for bone volume/tissue volume (BV/TV), trabecular number (Tb.N), trabecular thickness (Tb.Th), trabecular separation (Tb.Sp), and bone mineral density of bone volume (BMD BV); n=6 per group, n.s.=not statistically significant.
